# Supplementary material for: PAR-1 contributes to the innate immune response during viral infection
Source: JCI journal article supplement (doi:10.1172/jci66125), 2013-02-08
Supplement: sd1 [file 1]

## Supplement Figure 1

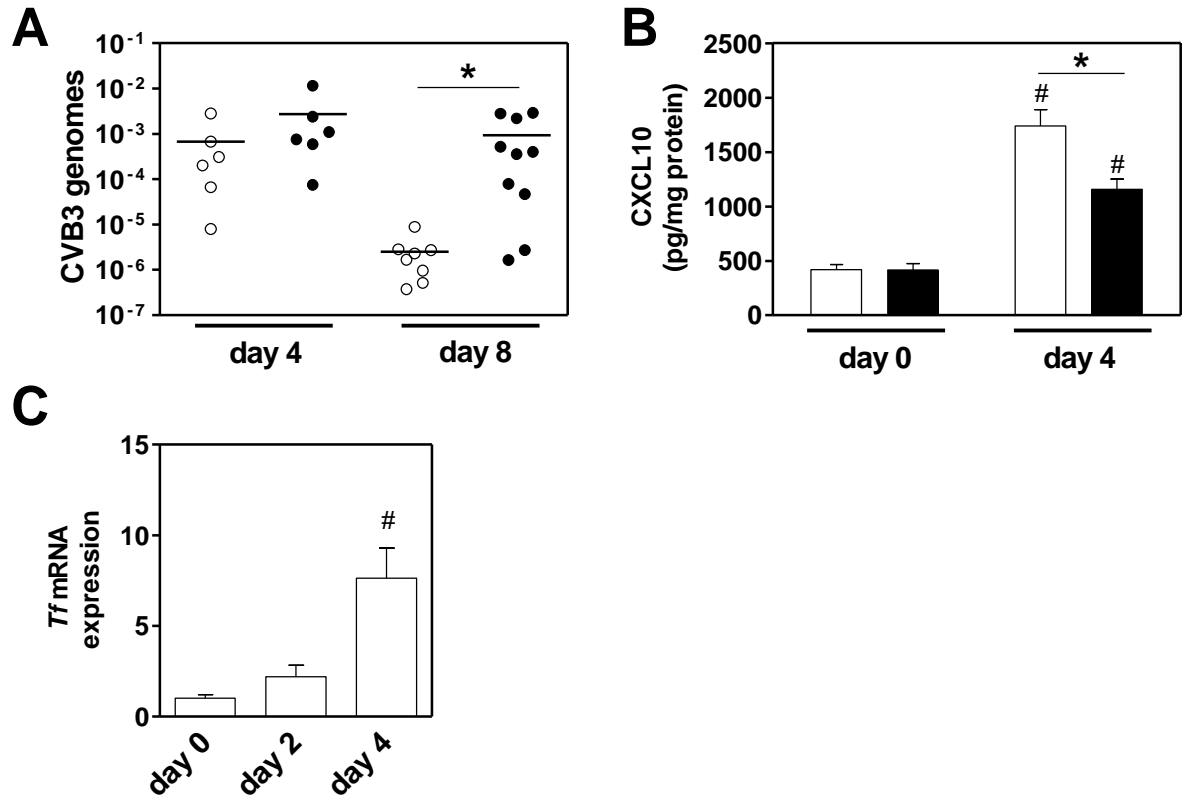

**Supplement figure 1: Virus load, CXCL10 levels and TF expression after CVB3 infection**

**in *Par-1*<sup>+/+</sup> and *Par-1*<sup>-/-</sup> mice.** (A) Levels of CVB3 genomes in livers of *Par-1*<sup>+/+</sup> mice (white circles) and *Par-1*<sup>-/-</sup> mice (black circles). (B) Hepatic CXCL10 protein levels before and 4 days after infection. (C) Tf mRNA expression in livers before, 2 and 4 days after CVB3 infection. \*p < 0.05 between the different groups. #p < 0.05 represents differences versus day 0 within the same genotype. Means ± SEM are shown (n = 4-10). Data were analyzed by a 1-way (B, C) and 2-way (A) ANOVA test.
